# Supplementary material
Source: PubMed Central journal article supplement (PMC9382964)
Supplement: 42761_2021_59_MOESM1_ESM.pdf [file 42761_2021_59_MOESM1_ESM.pdf]

**Supplemental Table S1.** Linear mixed effects analysis of Study 1 (ERQ-CR).

| <i>Predictors</i>                                    | <b>Percent Negative Ratings (Surprise Faces)</b> |              |             |
|------------------------------------------------------|--------------------------------------------------|--------------|-------------|
|                                                      | <i>Partially Standardized Estimates</i>          | <i>CI</i>    | <i>p</i>    |
| (Intercept)                                          | 0.05                                             | -0.37 – 0.46 | .818        |
| ERQ CR                                               | 0.22                                             | -0.22 – 0.65 | .330        |
| Time                                                 | 0.01                                             | -0.28 – 0.30 | .952        |
| Group                                                | -0.11                                            | -0.68 – 0.46 | .702        |
| ERQ CR x Time                                        | -0.41                                            | -0.71 – 0.10 | <b>.008</b> |
| ERQ CR x Group                                       | 0.28                                             | -0.30 – 0.85 | .344        |
| Time x Group                                         | 0.02                                             | -0.37 – 0.42 | .911        |
| ERQ CR x Time x Group                                | 0.46                                             | 0.06 – 0.86  | <b>.024</b> |
| <b>Random Effects</b>                                |                                                  |              |             |
| $\sigma^2$                                           | 0.22                                             |              |             |
| T00 Subject                                          | 0.68                                             |              |             |
| ICC                                                  | 0.76                                             |              |             |
| N Subject                                            | 43                                               |              |             |
| Observations                                         | 86                                               |              |             |
| Marginal R <sup>2</sup> / Conditional R <sup>2</sup> | 0.165 / 0.798                                    |              |             |

**Supplemental Table S2.** Linear mixed effects analysis of Study 1 (ERQ-ES)

| <b>Percent Negative Ratings (Surprise Faces)</b>     |                                         |              |          |
|------------------------------------------------------|-----------------------------------------|--------------|----------|
| <i>Predictors</i>                                    | <i>Partially Standardized Estimates</i> | <i>CI</i>    | <i>p</i> |
| (Intercept)                                          | 0.01                                    | -0.42 – 0.44 | 0.974    |
| ERQ ES                                               | 0.25                                    | -0.13 – 0.63 | 0.198    |
| Time                                                 | 0.03                                    | -0.27 – 0.33 | 0.861    |
| Group                                                | -0.01                                   | -0.65 – 0.64 | 0.986    |
| ERQ ES * Time                                        | -0.02                                   | -0.28 – 0.25 | 0.900    |
| ERQ ES * Group                                       | -0.10                                   | -0.82 – 0.61 | 0.780    |
| Time * Group                                         | -0.05                                   | -0.50 – 0.41 | 0.841    |
| ERQ ES * Time * Group                                | 0.11                                    | -0.39 – 0.61 | 0.674    |
| <b>Random Effects</b>                                |                                         |              |          |
| $\sigma^2$                                           | 0.26                                    |              |          |
| T00 Subject                                          | 0.78                                    |              |          |
| ICC                                                  | 0.75                                    |              |          |
| N <sub>Subject</sub>                                 | 43                                      |              |          |
| Observations                                         | 86                                      |              |          |
| Marginal R <sup>2</sup> / Conditional R <sup>2</sup> | 0.046 / 0.765                           |              |          |

**Supplemental Table S3.** Linear mixed effects analysis of Study 2.

| <i>Predictors</i>                                    | <b>Percent Negative Ratings (Surprise Faces)</b> |               |                  |
|------------------------------------------------------|--------------------------------------------------|---------------|------------------|
|                                                      | <i>Partially Standardized Estimates</i>          | <i>95% CI</i> | <i>p</i>         |
| (Intercept)                                          | -0.19                                            | -0.39 – 0.00  | .055             |
| ERQ CR                                               | -0.05                                            | -0.25 – 0.15  | .622             |
| Time                                                 | 0.40                                             | 0.17 – 0.62   | <b>&lt; .001</b> |
| PSS                                                  | -0.08                                            | -0.27 – 0.12  | .454             |
| ERQ CR x Time                                        | 0.08                                             | -0.15 – 0.30  | .508             |
| ERQ CR x PSS                                         | 0.16                                             | -0.04 – 0.37  | .119             |
| Time x PSS                                           | 0.17                                             | -0.05 – 0.40  | .137             |
| ERQ CR x Time x PSS                                  | -0.27                                            | -0.51 - -0.04 | <b>.022</b>      |
| <b>Random Effects</b>                                |                                                  |               |                  |
| $\sigma^2$                                           | 0.61                                             |               |                  |
| T00 Subject                                          | 0.34                                             |               |                  |
| ICC                                                  | 0.36                                             |               |                  |
| N <sub>Subject</sub>                                 | 97                                               |               |                  |
| Observations                                         | 194                                              |               |                  |
| Marginal R <sup>2</sup> / Conditional R <sup>2</sup> | 0.074 / 0.407                                    |               |                  |
